# Supplementary material for: Hierarchically grown CdS/α-Fe2O3 heterojunction nanocomposites with enhanced visible-light-driven photocatalytic performance
Source: Royal Society of Chemistry journal article supplement (doi:10.1039/c3dt51492g), 2013-01-01
Supplement: c3dt51492g.pdf [file c3dt51492g.pdf]

**Hierarchically grown CdS/ $\alpha$ -Fe<sub>2</sub>O<sub>3</sub> heterojunction nanocomposites with enhanced visible-light-driven photocatalytic performance**

Shouwei Zhang,<sup>a,b</sup> Wenqing Xu<sup>c</sup> Meiyi Zeng,<sup>b</sup> Jiaying Li,<sup>a</sup> Jinzhang Xu,<sup>b\*</sup> Xiangke Wang<sup>a\*</sup>

<sup>a</sup> Key Laboratory of Novel Thin Film Solar Cells, Institute of Plasma Physics, Chinese Academy of Sciences, 230031, Hefei, PR China.

<sup>b</sup> School of Materials Science and Engineering, Hefei University of Technology, Hefei 230031, China

<sup>c</sup> Department of Chemical Engineering, Environmental Engineering Program, Yale University New Haven, Connecticut 06520

\* Corresponding author. E-mail: [xkwang@ipp.ac.cn](mailto:xkwang@ipp.ac.cn). (X. Wang) Fax: +86-551-65591310; Tel: +86-551-65592788;

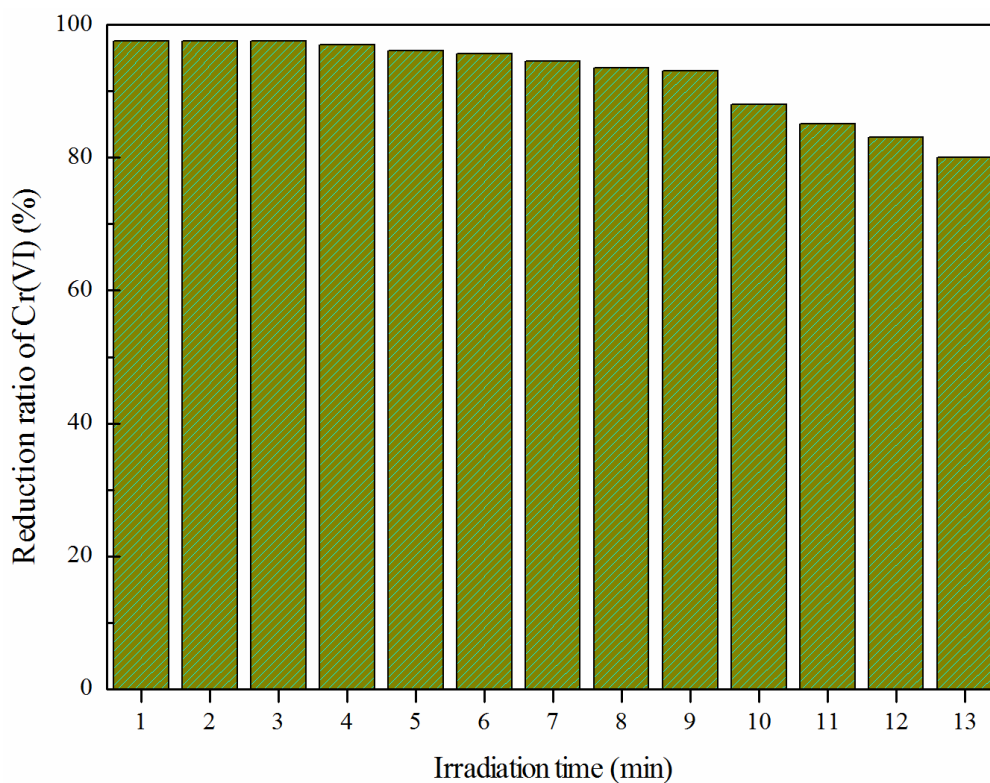

Figure S1. 13 cycles of the photocatalytic activity for reduction of Cr(VI) using CdS/ $\alpha$ -Fe<sub>2</sub>O<sub>3</sub>-C as the photocatalyst under visible light irradiation.

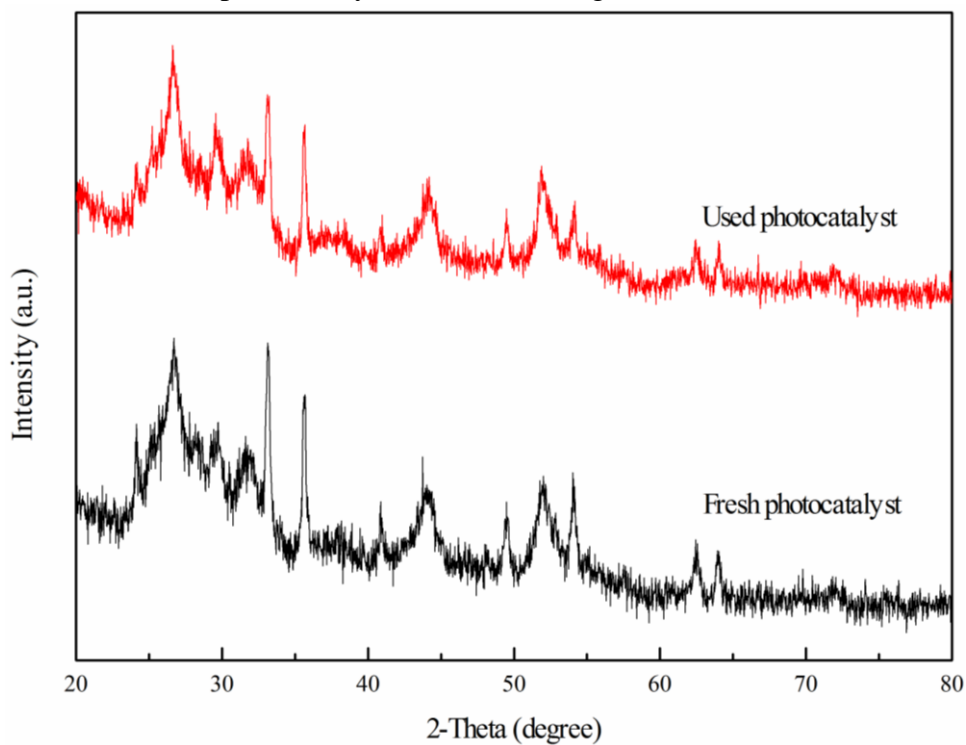

Figure S2. XRD patterns of CdS/ $\alpha$ -Fe<sub>2</sub>O<sub>3</sub>-C before and after photocatalytic reduction of Cr(VI).
